# Supplementary material for: Towards the thermal stability of dye-sensitized solar cells for wavelength-selective greenhouses using the polymorphism of light-scattering layers
Source: Royal Society of Chemistry journal article supplement (doi:10.1039/d3se01084h), 2023-12-06
Supplement: d3se01084h1.pdf [file d3se01084h1.pdf]

**Supplementary material**  
**for**

***Towards thermal stability of dye-sensitized solar cells for wavelength-selective greenhouse  
using the polymorphism of the light scattering layer***

Daniel Ursu<sup>1</sup>, Melinda Vajda<sup>1,2</sup>, Elisei Ilieș<sup>2</sup>, Radu Ricman<sup>2</sup>, Magdalena Marinca<sup>2</sup>, Szilard  
Bularka<sup>2</sup>, Marinela Miclau<sup>1</sup>, Aurel Gontean<sup>2</sup>

<sup>1</sup>*National Institute for Research and Development in Electrochemistry and Condensed Matter, A.  
Paunescu Podeanu Street, no 144, Timisoara 300569, Romania*

<sup>2</sup>*Politehnica University Timisoara, P-ta Victoriei, no. 2, Timisoara 300006, Romania*

Corresponding authors: [marinela.micla@gmail.com](mailto:marinela.micla@gmail.com) (M. Miclau), and [aurel.gontean@upt.ro](mailto:aurel.gontean@upt.ro) (A.  
Gontean)

**SPICE model generation steps:**

To generate the SPICE model of solar cells, the following steps are required according to our method:

- i. Get IV curves at different temperatures. For our cells we got IV curves at temperatures in range 20-60 °C with step of one degree Celsius. During IV curve measurements, the environment and solar cell temperature are also monitored.
- ii. Process data. The measurements are affected by noise, so to get rid of them we use „Smoothing Splines” interpolant method.
- iii. Estimate series and parallel resistors. In this step we obtain minimum and maximum boundaries for resistor values which will be used to restrict solution search field for algorithm.

$$R_s = - \left. \frac{dV}{dt} \right|_{V=V_{oc}}$$

$$R_p = - \left. \frac{dV}{dt} \right|_{I=I_{sc}}$$

- iv. To find those 5 parameters of models we used Global Optimization Toolbox from MATLAB set to use particle swarm intelligence.
- v. After that, for each parameter we find a mathematical equation to model de temperature influence on it. The mathematical equations are use then to generate spice model
- vi. Evaluate model to find the errors.
